# Supplementary material for: Impact of the 13-Valent Pneumococcal Conjugate Vaccine on Severe Invasive Disease Caused by Serotype 3 Streptococcus Pneumoniae in Italian Children
Source: MDPI journal article supplement (doi:10.3390/vaccines7040128), 2019-09-24
Supplement: s1 [file s1]

## SUPPLEMENTARY FILE

**Table S1.** Mean vaccination coverage for PCV13 in Italy.

| Year | Italian mean coverage                      | Minimum-maximum (Regional data)            |
|------|--------------------------------------------|--------------------------------------------|
| 2012 | Data not available for all Italian Regions | Data not available for all Italian Regions |
| 2013 | 86.9                                       | 44.5–95.9*                                 |
| 2014 | 87.5                                       | 76.6–98.5                                  |
| 2015 | 88.8                                       | 81.0–92.8                                  |
| 2016 | 88.3                                       | 80.5–97.0                                  |
| 2017 | 90.9                                       | 83.8–96.7                                  |

\*only 3/20 Italian Regions: Calabria, Abruzzo and Sardegna (which together account for 7.6% of Italian population 0–16 years) were below 75% coverage for Streptococcus pneumoniae vaccination.

Available online: [http://www.salute.gov.it/portale/documentazione/p6\\_2\\_8\\_3\\_1.jsp?lingua=italiano&id=20](http://www.salute.gov.it/portale/documentazione/p6_2_8_3_1.jsp?lingua=italiano&id=20) (accessed on 18 July 2019).

**Table S2.** Person years for each age class and each study year during the study. Data were obtained from the National Italian Statistic Institute (ISTAT) at <http://demo.istat.it/>. The pre-PCV13 period is shown in Yellow is shown and the post-PCV13 period in blue. Total “million person years” have been calculated and used as denominators for crude incidence rates.

|              | Year | 2006    | 2007    | 2008    | 2009    | 2010    | 2011    | 2012    | 2013    | 2014    | 2015    | 2016    | 2017    | 2018<br>Jan-Aug | Total Million Person Year |           |            |
|--------------|------|---------|---------|---------|---------|---------|---------|---------|---------|---------|---------|---------|---------|-----------------|---------------------------|-----------|------------|
| Age<br>Class |      |         |         |         |         |         |         |         |         |         |         |         |         |                 | Age<br>Class              | Pre PCV13 | Post PCV13 |
| 7–8          |      | 542,089 | 548,265 | 562,861 | 559,967 | 561,260 | 568,432 | 561,023 | 559,948 | 573,979 | 574,211 | 576,106 | 569,379 | 326,656         | 7–8                       | 6,757,520 | 326,656    |
| 6–7          |      | 543,966 | 557,310 | 555,705 | 558,416 | 566,434 | 575,185 | 556,531 | 563,851 | 574,555 | 576,926 | 570,072 | 560,438 | 317,865         | 6–7                       | 6,198,951 | 878,303    |
| 5–6          |      | 552,603 | 550,057 | 554,741 | 563,618 | 572,851 | 569,347 | 560,414 | 563,733 | 576,775 | 570,721 | 560,984 | 545,362 | 311,765         | 5–6                       | 5,634,860 | 1,418,111  |
| 4–5          |      | 545,498 | 549,414 | 559,960 | 569,655 | 567,113 | 573,500 | 560,099 | 565,676 | 570,547 | 561,808 | 546,008 | 534,694 | 298,638         | 4–5                       | 5,061,462 | 1,941,148  |
| 3–4          |      | 545,108 | 554,812 | 565,975 | 563,816 | 570,925 | 572,270 | 561,250 | 559,136 | 561,406 | 546,910 | 534,890 | 511,743 | 293,417         | 3–4                       | 4,493,292 | 2,448,366  |
| 2–3          |      | 550,865 | 561,735 | 559,638 | 567,379 | 569,438 | 577,278 | 554,608 | 549,886 | 546,986 | 535,706 | 511,760 | 502,078 | 284,054         | 2–3                       | 3,940,941 | 2,930,470  |
| 1–2          |      | 557,219 | 554,884 | 563,429 | 566,368 | 574,611 | 567,607 | 544,814 | 538,422 | 536,114 | 511,794 | 500,679 | 485,283 | 276,247         | 1–2                       | 3,384,118 | 3,393,353  |
| 0–1          |      | 547,159 | 554,966 | 558,624 | 569,883 | 562,566 | 555,791 | 531,572 | 524,021 | 509,053 | 496,627 | 479,611 | 467,657 | 266,112         | 0–1                       | 2,793,198 | 3,830,244  |

**Table S3.** Serotype-specific invasive pneumococcal disease number of cases and intragroup percentage representation in Italian children under 8 years of age born before 2011, after 2011 and vaccinated with PCV13. Non-PCV13: Pneumococcal serotypes not included in PCV13.

| Serotype  | Cases in Born before 2011 | Cases in Born after 2011 | Cases in Born after 2011 and Vaccinated | % in Born before 2011 | % in Born after 2011 | % in Vaccinated Children |
|-----------|---------------------------|--------------------------|-----------------------------------------|-----------------------|----------------------|--------------------------|
| 1         | 61                        | 2                        | 2                                       | 28.24                 | 2.94                 | 5.26                     |
| 3         | 38                        | 22                       | 16                                      | 17.59                 | 32.35                | 42.11                    |
| 4         | 1                         | 0                        | 0                                       | 0.46                  | 0.00                 | 0.00                     |
| 5         | 6                         | 0                        | 0                                       | 2.78                  | 0.00                 | 0.00                     |
| 6/6A/6B   | 11                        | 1                        | 0                                       | 5.09                  | 1.47                 | 0.00                     |
| 7F        | 17                        | 1                        | 0                                       | 7.87                  | 1.47                 | 0.00                     |
| 9V        | 1                         | 1                        | 0                                       | 0.46                  | 1.47                 | 0.00                     |
| 14/14B    | 8                         | 1                        | 0                                       | 3.70                  | 1.47                 | 0.00                     |
| 18        | 2                         | 1                        | 1                                       | 0.93                  | 1.47                 | 2.63                     |
| 19A       | 30                        | 3                        | 0                                       | 13.89                 | 4.41                 | 0.00                     |
| 19F/B     | 6                         | 1                        | 0                                       | 2.78                  | 1.47                 | 0.00                     |
| 23F       | 2                         | 0                        | 0                                       | 0.93                  | 0.00                 | 0.00                     |
| Non-PCV13 | 33                        | 35                       | 19                                      | 15.28                 | 51.48                | 50.00                    |
| Total     | 216                       | 68                       | 38                                      | 100                   | 100                  | 100                      |

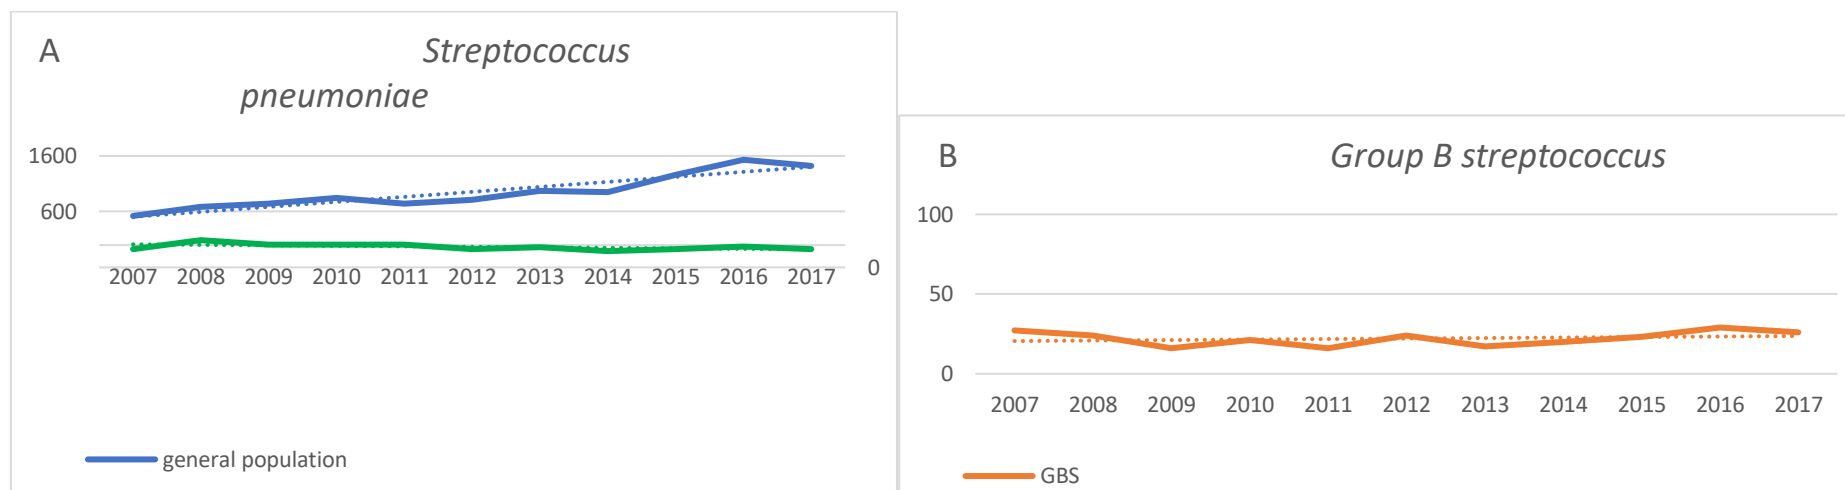

**Figure S1.** Influence of the surveillance of invasive bacterial diseases (IBD) in Italy. Ministerial data on number of cases per year of invasive bacterial diseases caused by *Streptococcus pneumoniae* (**A** – continuous blue line) and by Group B Streptococcus (**B**) from 2007 to 2017 in Italy. Starting from 2015 the registered number of cases of *Streptococcus pneumoniae* (SP) IBD in the general population has progressively increased. Based on data released by Italian Health Institute, such a raise is dependent on the improvement in diagnostic sensitivity and on the increase in attention paid by health professionals to surveillance of *Neisseria meningitidis*, *Streptococcus pneumoniae* and *Haemophilus influenzae* all over Italy in consequence of specific projects of the Italian Ministry of Health. Cases due to pathogens not subject to surveillance - such as *Group B streptococci* (GBS) - did not increase in the last years. Panel A also shows the number of cases of IBD caused by *Streptococcus pneumoniae* in children under 9 years of age (continuous green line) that is substantially stable despite the effect of the augmented surveillance. Such a trend is likely due to the impact of the pneumococcal conjugate vaccination (PCV) which has been offered to this age group. Dotted lines represent trends.

The “Surveillance of invasive bacterial diseases in Italy” is a project of the Italian Health Institute (Italian Ministry of Health) and works in parallel but separately from the Molecular Surveillance Registry. Available online: [http://old.iss.it/binary/mabi/cont/Report\\_MBI2\\_2007\\_2010.pdf](http://old.iss.it/binary/mabi/cont/Report_MBI2_2007_2010.pdf); [http://old.iss.it/binary/mabi/cont/Report\\_MBI\\_20150812\\_V5.pdf](http://old.iss.it/binary/mabi/cont/Report_MBI_20150812_V5.pdf); <http://old.iss.it/binary/mabi/cont/Report2017.pdf>; (accessed on 18 July 2019).
